# Supplementary material for: Sequential Anti-Cytomegalovirus Response Monitoring May Allow Prediction of Cytomegalovirus Reactivation after Allogeneic Stem Cell Transplantation
Source: PLoS One. 2012 Dec 13;7(12):e50248. doi: 10.1371/journal.pone.0050248 (PMC3521740; doi:10.1371/journal.pone.0050248)
Supplement: Table S1 — Overview on quality considerations and their applicability to the current cohort. In order to detect tetramer-positive cells at a reliable event rate using the FACS analysis the population requires more than 10 events and the CD8 count must be above 50 per µl blood (using a 200 µl aliquot for staining). Complying with these quality constraints guarantees the theoretical detection of 0.1% tetramer-positive cells (0.05 tetramer-positive cells per µl blood). (XLS) [file pone.0050248.s005.xls]

## Sheet: Overview quality criteria
	Table S1
	Overview on quality considerations and their applicability to the current cohort
	Cut-Off CD3+CD8	total amount of CD3+CD8 in 200 µl blood	number of tetramer positive events at give percentage						cohort data			detection limits at given cut-off*
			10% tetramer positive	1% tetramer positive	0.5% tetramer positive	0.1% tetramer positive	0.05% tetramer positive	0.01% tetramer positive	measure-ments above cut-off in current cohort	% neclected data	% accepted tests	% tetramer positive	tetramer positive / µl blood
	500** CD8 / µl	100000	10000	1000	500	100	50	10	946	0.49	0.51	0.0001	0.05 cells
	100 CD8 / µl	20000	2000	200	100	20	10	2	1814	0.15	0.85	0.0005	0.05 cells
	50 CD8 / µl	10000	1000	100	50	10	5	1	1712	0.08	0.92	0.001	0.05 cells
	10 CD8 / µl	2000	200	20	10	2	1	0.2	1578	0.05	0.95	0.005	0.05 cells
	*tetramer-positive population has to consist of ≥ 10 events; **median in the cohort: 515/µl, mean 826/µl
