# Supplementary material for: Sequential Anti-Cytomegalovirus Response Monitoring May Allow Prediction of Cytomegalovirus Reactivation after Allogeneic Stem Cell Transplantation
Source: PLoS One. 2012 Dec 13;7(12):e50248. doi: 10.1371/journal.pone.0050248 (PMC3521740; doi:10.1371/journal.pone.0050248)
Supplement: Table S2 — Switches and clinical characteristics at time of switch. Overview on the 19 patients with switches: patient number, tetramers switching (i.e. which tetramer yielded the higher CMV-CTL per µl blood), time of switch, donor type, CMV-reactivation(s), occurrence of GvHD, application of DLI and relapse are shown. Switches did not correlate with the time clinical events like e.g. CMV-reactivation or DLI. (XLS) [file pone.0050248.s006.xls]

## Sheet: switches_n=278
Table S2. Switches and clinical characteristics at time of switch
#	Type of switch	Switch [days post-HSCT]	Donor	CMV-serostatus	CMV-reactivation(s); [days post-HSCT]	aGvHD onset [days post-HSCT] (grade)	cGvHD onset [days post-HSCT]	DLI [days post-HSCT]	Relapse; [days post-HSCT]
1	A0101 " B0801	+109	MUD	R+/D+	yes; +27	no	no	yes; +133	yes; +125
2	A0201 " A2402	+348	MUD	R+/D+	yes; +31	+21 (II)	no	yes; +212, +281, +309	yes; +231
3	A0101 " B0801	+241	MUD	R+/D+	yes; +12	no	no	no	no
4	A0101 " B0801	+190	MUD	R+/D+	yes; +22, +48	no	no	yes; +150, +170, +220	no
5	A0101 " A0201	+52	MUD	R+/D+	yes; +154	+33 (II)	yes; +138	no	no
	A0201 ¦ A0101	+84
	A0101 " A0201	+427
6	A0101 " B0702	+276	MUD	R+/D+	yes; +35	no	no	yes; +144, +185, +238	no
7	A0101 " B0801	+387	MRD	R+/D+	yes; +35	no	yes; +104	no	no
8	A0101 " B0801	+117	MUD	R+/D+	yes; +41	no	no	no	no
9	A0201 " B0801	+47	MUD	R+/D+	no	no	ques.; +115	no	no
	A0201 " A0101	+54
10	B3501 " A0201	+128	MRD	R+/D+	no	+55 (I)	no	yes; +248, +282, +318	yes; +204
	A0201 " B3501	+180
	B3501 " B0801	+288
	A0201 " B0801	+288
11	A2402 " B0801	+130	MUD	R+/D+	yes; +18	no	no	no	no
	A2402 " A0101	+145
	A0101 " B0801	+145
	B0801 " A0101	+175
	A0101 " B0801	+235
12	A0201 " B0801	+735	MMRD	R-/D-	yes; +4 (de novo)	+29 (II)	no	no	no
13	B0801 " A0101	+182	MRD	R+/D-	no	+20 (I)	yes; +306	no	no
	A0101 " B0801	+441
14	A0101 " B0801	+301	MUD	R+/D+	no	+52 (II)	yes; +171	no	no
15	A0101 " B0801	+156	MRD	R+/D+	yes; +43	no	no	no	no
16	A0801 " B3501	+297	MRD	R+/D+	no	no	yes; +94	no	no
17	A0101 " B0801	+149	MUD	R+/D+	yes; +56	+43 (I)	yes; +251	no	no
18	A0201 " B3501	+128	MUD	R+/D-	yes; +43	no	no	yes, +191, +229, +280	no
19	A3501 " B0801	+66	MUD	R+/D+	yes, +46	n/a	n/a	no	no
Abbreviations: Acute/chronic graft versus host disease (a/cGvHD), donor lymphocyte infusion (DLI), D (donor), R (recipient), n/a: data not available. While CMV serostatus was R+/D+ in 16/19 patients, patient #12 was R-/D- and experienced a de novo CMV infection post-HSCT.
